# Supplementary material
Source: publisher site journal article supplement (https://www.spandidos-publications.com/6951/downloadSupplementary)
Supplement: Supplementary file 1 [file downloadSupplementary]

## Sheet: Sheet1
Table SVI. 50 treatment sensitive drugs with significant differences in acute myeloid leukemia.
No	Drug name
1	Dasatinib
2	BI.2536
3	Paclitaxel
4	Lapatinib
5	PD.0325901
6	JW.7.52.1
7	Erlotinib
8	Bortezomib
9	Roscovitine
10	BMS.536924
11	GNF.2
12	Bryostatin.1
13	AZD6244
14	MG.132
15	Parthenolide
16	WZ.1.84
17	CGP.60474
18	NVP.TAE684
19	Pazopanib
20	Z.LLNle.CHO
21	A.443654
22	RDEA119
23	Rapamycin
24	Sunitinib
25	GW843682X
26	AZ628
27	A.770041
28	CI.1040
29	PHA.665752
30	CGP.082996
31	CMK
32	WH.4.023
33	XMD8.85
34	LFM.A13
35	JNJ.26854165
36	BMS.509744
37	PF.02341066
38	SL.0101.1
39	S.Trityl.L.cysteine
40	KU.55933
41	Salubrinal
42	GSK269962A
43	AZD.0530
44	KIN001.135
45	DMOG
46	FTI.277
47	AUY922
48	Metformin
49	Bicalutamide
50	PF.4708671
